# Supplementary material
Source: publisher site journal article supplement (https://static.cambridge.org/content/id/urn:cambridge.org:id:article:S0924933820000486/resource/name/S0924933820000486supp001.docx)
Supplement: Supplementary file 1 [file S0924933820000486supp001.docx]

|  | **Means (SD)** | | | **p-values (η2)** | | |
| --- | --- | --- | --- | --- | --- | --- |
|  | **HC** | **OCD** | **SCZ** | **HC-OCD** | **OCD-SCZ** | **HC-SCZ** |
| **Correct responses** | | | | | | |
| **Internal source-monitoring** | | | | | | |
| Imagined | 6.14 (1.43) | 4.88 (1.83) | 3.95 (1.99) | 0.019* (0.13) | 0.046* (0.05) | <0.001***  (0.28) |
| Said | 5.93 (1.31) | 5.31 (2.25) | 5.03 (1.95) | 0.479 (0.03) | 0.696 (0.004) | 0.278 (0.06) |
| New | 7.76 (0.43) | 7.59 (0.76) | 7.76 (0.49) | 0.151 (0.02) | 0.139 (0.02) | 0.148 (0) |
| Within-subject p-value<0.001*** Between-subject p-value=0.007** Interaction p-value=0.002** | | | | | | |
| **Reality-monitoring** | | | | | | |
| Imagined | 5.86 (1.94) | 5.19 (1.99) | 3.92 (2.27) | 0.25 (0.03) | 0.015* (0.59) | 0.001** (0.91) |
| Heard | 6.03 (1.5) | 5.72 (1.88) | 4.87 (1.96) | 0.7 (0.18) | 0.07 (0.44) | 0.037* (0.65) |
| New | 7.66 (0.48) | 7.69 (0.53) | 7.32 (0.82) | 0.79 (0.06) | 0.069 (0.53) | 0.147 (0.49) |
| Within-subject p-value<0.001*** Between-subject p-value=0.001** Interaction p-value=0.066 | | | | | | |
| **Inversion bias** | | | | | | |
| **Internal source-monitoring** | | | | | | |
| Internalizations | 1.48 (1.09) | 1.50 (1.48) | 1.34 (1.3) | 0.67 (<0.001) | 0.47 (0.003) | 0.26 (0.003) |
| Externalizations | 0.62 (0.82) | 1 (1.29) | 1.47 (1.16) | 0.26 (0.03) | 0.09 * (0.03) | 0.007 ** (0.146) |
| Within-subject p-value=0.005** Between-subject p-value=** Interaction p-value=0.016* | | | | | | |
| **Reality-monitoring** | | | | | | |
| Internalizations | 1.31 (1.04) | 1.22 (1.34) | 1.74 (1.33) |  | | |
| Externalizations | 0.86 (1.27) | 1.75 (1.59) | 1.39 (1.7) |
| Within-subject p-value=0.735 Between-subject p-value=0.422 Interaction p-value=0.088 | | | | | | |
| **Forgetting bias** | | | | | | |
| **Internal source-monitoring** | | | | | | |
| Imagined | 1.24 (1.154) | 2.13 (1.43) | 2.58 (2.02) | 0.036* (0.13) | 0.246 (0 .02) | 0.001** (0.10) |
| Said | 0.59 (0.78) | 1.19 (1.18) | 1.63 (1.81) | 0.091 (0.08) | 0.181 (0.02) | 0.003** (0.11) |
| Within-subject p-value<0.001*** Between-subject p-value=0.001 ** Interaction p-value=0.007 ** | | | | | | |
| **Reality-monitoring** | | | | | | |
| Imagined | 1.38 (1.35) | 1.81 (1.65) | 2.45 (2.01) | 0.329 (0.02) | 0.128 (0.03) | 0.014* (0.08) |
| Heard | 0.66 (0.97) | 1.09 (0.99) | 1.39 (1.37) | 0.139 (0.05) | 0.277 (0.01) | 0.01* (0.08) |
| Within-subject p-value<0.001 *** Between-subject p-value=0.008 ** Interaction p-value=0.669 | | | | | | |

After significant ANOVA, groups were compared using TukeyLSD post-hoc tests. Internalization bias are measured as the number of heard words that were classified as imagined (range 0-8). Externalization bias are measured as the number of imagined words that were classified as heard (range 0-8). Forgetting bias are measured as the number of old words (imagined or said) that were classified as new (range 0-8). * p < 0.05; ** p < 0.01; *** p < 0.001
